# 1 **Three-dimensional chromatin organisation shapes origin activation and replication fork** 2 **directionality**

3  
4 Katherine A. Giles<sup>1,2</sup>, Noa Lamm<sup>1</sup>, Phillippa C. Taberlay<sup>2,3</sup>, Anthony J. Cesare<sup>1,3,4</sup>

## 5 6 **Affiliations:**

7 <sup>1</sup>Children's Medical Research Institute, University of Sydney, Westmead, New South Wales,  
8 2145, Australia

9 <sup>2</sup>Tasmanian School of Medicine, College of Health and Medicine, University of Tasmania,  
10 Hobart, Tasmania, 7050, Australia

11 <sup>3</sup>Corresponding Authors

12 <sup>4</sup>Lead Contact

13  
14 Corresponding author and lead contact e-mail addresses:

15 [tcesare@cmri.org.au](mailto:tcesare@cmri.org.au)

16 [phillippa.taberlay@utas.edu.au](mailto:phillippa.taberlay@utas.edu.au)

## 17 18 **Summary**

19 Faithful DNA replication requires the orderly firing of replication origins across the genome.  
20 At present, we lack details around how origins are selected for activation and the subsequent  
21 impact of this on replication dynamics. Here, we have investigated how chromatin organisation  
22 contributes to replication initiation and dynamics by intersecting ChIP-seq, Hi-C, Repli-seq,  
23 and OK-seq data from primary and tumour cells lines. We found replication initiation is  
24 significantly enriched at TAD boundaries, co-localizing with CTCF and cohesin in early and  
25 mid S-phase. Strong replication fork directionality (RFD) from initiation zones in TAD  
26 boundaries could occur in a bi- or uni-directional manner, which highly correlated with  
27 replication timing. While TAD boundaries were largely invariant, a minority of initiation zones  
28 were shared across cell lines, indicative of cell type specific regulation. These data are  
29 consistent with chromatin structure organizing replication initiation and dynamics, ensuring  
30 orderly completion of replication from TAD boundaries into TAD internal regions.

## 31 32 **Keywords**

33 Chromatin, Chromatin Structure, Genome organisation, Replication origins, DNA Replication,  
34 Replication initiation, Replication timing, TADs, TAD boundaries

## 35 **Introduction**

36 Faithful DNA replication requires ordered copying of the genome once per cell cycle. During  
37 S-phase DNA replication initiates from specialised chromatin regions called origins (Jacob and  
38 Brenner, 1963). Prior to S, replication origin licencing commences in mitosis and continues  
39 through G1-phase. This process initiates with origin recognition complex (ORC) binding to the  
40 DNA, followed by CDC6 and CDT1 cofactor association with chromatin bound ORC, and  
41 culminating with recruitment of the minichromosome maintenance (MCM) replicative helicase  
42 complex to form the pre-replication complex (Ding and Koren, 2020). Once established,  
43 origins remain dormant until DNA synthesis initiates in S, during which a subset of licensed  
44 origins are activated in sequential fashion across the genome (Limas and Cook, 2019). The  
45 human genome contains between 30,000-50,000 licensed origins (Cvetic and Walter, 2005;  
46 Mechali, 2010) that are well spaced to ensure the entire genome is replicated. It remains  
47 unclear, however, how origins are recognised and selected for activation to ensure a timely S-  
48 phase (Marks et al., 2017).

49  
50 Chromatin is a dynamic, three-dimensional (3D) structure comprised of DNA, histones, and  
51 other associated proteins. During interphase, chromatin is arranged into topological associated  
52 domains (TADs) that compartmentalise the genome into nuclear micro-environments. This  
53 facilitates DNA dependent functions, such as enhancer-promoter interactions for transcription  
54 (Achinger-Kawecka et al., 2020; Giles et al., 2019; Khoury et al., 2020; Taberlay et al., 2016;  
55 Wang et al., 2019; Zhang and Kutateladze, 2019). TADs also influence replication timing  
56 precision (Du et al., 2021; Pope et al., 2014). This is regulated in part through TAD  
57 organization in 3D space, with early replicating TADs positioned at the nuclear centre and late  
58 replicating TADs at the nuclear periphery (Dimitrova and Gilbert, 1999). While the replication  
59 program is highly linked to 3D chromatin organisation, local chromatin features also exert  
60 influence on replication dynamics. For example, early replicating TADs contain cis-acting  
61 elements with enhancer like properties that govern domain-wide control over replication timing  
62 (Sima et al., 2019). The intimate connection between chromatin organisation and replication  
63 timing establishes a functional role, yet it remains unclear how 3D chromatin structure is linked  
64 to initiation events or replication fork dynamics during DNA synthesis.

65  
66 Here, we have identified connectivity between 3D chromatin organisation, origin activation,  
67 replication fork directionality, and replication timing in both cancer and primary human cells.  
68 We found that replication initiation is significantly enriched at TAD boundaries specifically in

69 early and mid, but not late, S-phase. Examining temporal replication dynamics revealed a  
70 prominent correlation between replication fork directionality (RFD) and replication timing.  
71 Strong RFD correlated with decreased replication timing as a function of genetic distance from  
72 the initiation zone, indicative of persistent replication from the initiation site into the TAD as  
73 S-phase progresses. Conversely weak RFD correlated with minimal change in replication  
74 timing indicative of local forks moving in both directions for shorter distances. Strong RFD  
75 scores could be bi- or uni-directional from an individual initiation zone. Cohesin, CTCF, and  
76 chromatin accessible sites were significantly enriched at early and mid-initiation zones,  
77 regardless of strong or weak RFD, but were not enriched at late initiation zones. While HeLa  
78 carcinoma, K562 leukemia lymphoblast, and IMR90 primary fibroblasts displayed common  
79 TAD boundary initiation zones, most initiation sites were not shared across all three cell types.  
80 Together these data expand the prior observation that replication initiates at TAD boundaries  
81 (Emerson et al., 2022; Lombardi and Tarsounas, 2020; Petryk et al., 2016) and reveal a broad  
82 functional role for 3D chromatin organisation in replication dynamics with cell type specific  
83 regulation.

84

## 85 **Results**

### 86 **Early- and mid-S replication initiation zones are associated with TAD boundaries**

87 Local chromatin organisation contributes to the spatiotemporal replication program (Audit et  
88 al., 2009; Guillou et al., 2010; Smith and Aladjem, 2014; Su et al., 2020). In concordance, we  
89 found that the architectural chromatin factors cohesin (Rad21 and SMC3 subunits) and CTCF,  
90 as well as chromatin accessible sites, were highly colocalised with ORC binding (Figure 1A-  
91 B) in publicly available ChIP-seq and DNase-seq data sets from HeLa cervical carcinoma and  
92 K562 leukemia lymphoblast cells (Supplementary Table 1). Cohesin and CTCF have diverse  
93 chromatin architectural roles beyond local chromatin organisation, including TAD formation  
94 (Nuebler et al., 2018; Rao et al., 2014; Wutz et al., 2017), and we thus investigated possible  
95 connections between replication origins and 3D chromatin architecture.

96

97 To do so we compared publicly available Hi-C, Repli-seq, and OK-seq data derived from  
98 HeLa, K562, and IMR90 primary fibroblast cultures (Supplementary Table 1). Hi-C identifies  
99 3D chromatin organization including TAD architecture, Repli-seq reveals when during S-phase  
100 segments of DNA are replicated (replication timing), and OK-seq identifies the location of  
101 newly synthesised Okazaki fragments on the discontinuous lagging-strand during DNA  
102 replication (Burgers and Kunkel, 2017; Liu et al., 2022; Petryk et al., 2016). Mapping Okazaki

103 fragments from OK-seq in a strand specific manner identifies replication fork direction, which  
104 is used to delineate replication initiation and termination zones (Liu et al., 2022; Petryk et al.,  
105 2016). Initiation zones are regions of active replication initiation, in contrast to ORC binding,  
106 which delineates both active origins and those which are licenced but remain dormant.

107

108 Intersecting replication initiation zones, TAD architecture, and replication timing, revealed a  
109 strong association between these features. In all three cell lines examined replication initiation  
110 was significantly enriched (observed/expected > 1; Benjamini–Hochberg adj p-value  
111  $p < 0.0001$ ) at TAD boundaries, which was strongly influenced by early and mid S-phase  
112 progression (Figure 1C). Specifically, 71-90% of replication initiation zones in early S (HeLa  
113 71%, IMR90 90% and K562 79%), and 58-78% of replication initiation zones in mid S (HeLa  
114 58%, IMR90 78% and K562 68%), were located within TAD boundaries (Supplementary  
115 Figure 1A-C). Conversely, in late S-phase 54-72% of replication initiation zones were  
116 internalized within TADs (HeLa 57%, IMR90 54% and K562 72%; Supplementary Figure 1A-  
117 C) and were significantly depleted from TAD boundaries (observed/expected < 1; Benjamini–  
118 Hochberg adj p-value  $p < 0.0001$ ; Figure 1C). Replication thus initiates most often in early and  
119 mid-S from TAD boundaries, and as S-phase progresses the diminishing number of initiation  
120 events occur with a greater propensity inside TADs domains. Additionally, we observed TADs  
121 with late replicating internal regions whose boundaries exhibited early- or mid-S initiation  
122 events (as illustrated on chromosome 14, Figure 1D), consistent with replication progression  
123 from the boundary into the TAD as S-phase continues.

124

### 125 **Replication fork directionality and timing correlate with initiation events occurring at** 126 **TAD boundaries**

127 To gain a better understanding of TAD replication dynamics, we examined replication fork  
128 directionality and timing in the 100 kb on either side of replication initiation zones within TAD  
129 boundaries (Figure 2A-C and Supplementary Figures 2A-C, 3A-C). We defined strong RFD  
130 as a mean score of < -0.2 (left moving) or > +0.2 (right moving), and weak RFD as scores  
131 between -0.2 and +0.2. Intersected with RFD were Repli-seq data revealing when in S-phase  
132 the DNA sequences in the 100 kb region flanking regions were replicated.

133

134 In all three cell lines we identified a subset of TAD boundaries with DNA replication initiation  
135 in early, mid, and late S-phase that presented strong RFD scores (Figure 2A-C and  
136 Supplementary Figures 2A-C, 3A-C). These strong RFD signals were accompanied by a

137 progressive reduction in replication timing as a function of genetic distance from the initiation  
138 zone (Figure 2D-F and Supplementary Figures 2D-F, 3D-F). Conversely, when early- and mid-  
139 S initiation zones within TAD boundaries displayed weak RFD scores, this correlated to a  
140 minimal decrease in replication timing score as a function of distance from the initiation zone  
141 (Figure 2D-F). Weak or strong RFD from early- and mid-S phase initiation zones at TAD  
142 boundaries occurred in both a bi- and uni-directional manner, resulting in four classifications  
143 (strong both, strong right, strong left, weak both).

144  
145 The implication of these data are that the strength of replication fork directionality from  
146 initiation events within TAD boundaries directly correlates with the propensity for replication  
147 forks to advance a long-distance into the adjacent TAD as S-phase progresses. This outcome  
148 results in the progressive diminishment of replication timing moving away from the initiating  
149 zone as replication persists through S-phase. Contrarily, weak RFD from origins in TAD  
150 boundaries predominantly corresponded with minimal reduction in replication timing as a  
151 function of genetic distance from the initiation zone. The implication of this observation is that  
152 initiation zones with weak RFD have nearby forks concomitantly moving towards the weak  
153 initiation zone that diminish RFD score, result in timely completion of replication in the near-  
154 by genomic regions, and produce more frequent termination events. Examples of weak RFD  
155 from TAD boundaries are demonstrated in the early replicating TADs on chromosome 14 in  
156 Figure 1D, while strong RFD is demonstrated from the boundaries of the late replicating TADs.  
157 Initiation zones displaying strong uni-directional RFD suggest the strength of replication  
158 directionality and persistence is not an intrinsic property of an individual origin, but instead  
159 impacted by chromatin features in the adjacent region.

160  
161 The characteristics of strong uni-directional RFD from initiation zones within TAD boundaries  
162 varied dependent on S-phase stage. In mid and late S we observed initiation zones with strong  
163 right moving uni-directional RFD, adjacent to a downstream initiation zone on the right, which  
164 also exhibited a strong uni-directional rightward RFD. Similar events were observed with  
165 adjacent strong left moving uni-directional RFD (Figure 2B, 2E and Supplementary Figures  
166 2B, 2E, 3B, 3E). We sought to identify if adjacent initiation zones with strong uni-directional  
167 RFD in the same direction exhibited concurrent or progressive replication timing. We indeed  
168 found examples, such as on chromosome 5 (Figure 2G), where a mid-replicating boundary  
169 with a strong right moving fork had a mid-replicating TAD on the left and a late replicating  
170 TAD on the right. Similar was identified for strong left moving forks on chromosome 3,

171 between early to mid replicating TADs and as mid to late TADs (Figure 2H). In such events,  
172 the juxtaposition of forks with strong uni-directional RFD moving in the same orientation, with  
173 progressive reduced replication timing scores, is consistent with replication persisting with  
174 stable directional progression from initiation at the TAD boundary and into the TAD domain  
175 as S-phase progresses. Similar events were not common during early S-phase.

176

177 Similarity of outcomes across HeLa, K562 and IMR90 cells (Figure 2, and Supplementary  
178 Figures 2 and 3) indicates conservation of RFD and replication timing in diverse cells,  
179 consistent with 3D chromatin structure regulating replication outcomes.

180

### 181 ***Chromatin architecture proteins are enriched at all initiation zones regardless of RFD***

182 We also examined the enrichment of ORC, CTCF, cohesin subunits (Rad21 and SMC3), and  
183 chromatin accessible sites, at initiation zones in HeLa and K562 cells. We find that early and  
184 mid S-phase initiation zones were significantly enriched for all these features regardless of  
185 strong or weak RFD in both cell lines (Supplementary Figure 4A-D). Late S-phase initiation  
186 zones in K562, however, displayed significant enrichment of ORC2 and DNase sites, but  
187 cohesin and CTCF were neither significantly enriched nor depleted (Supplementary Figure  
188 4E). Conversely, in HeLa cells, ORC, cohesin, CTCF and DNase sites were all significantly  
189 depleted from strong uni-directional or weak bidirectional late S-phase initiation zones  
190 (Supplementary Figure 4F). Together these data suggests that local chromatin structure at  
191 active origins is linked to replication timing. Early and mid-replicating initiation zones are  
192 enriched for chromatin architectural proteins in both cell lines examined, while late replicating  
193 regions display cell type differences and may be void of these chromatin features. Further, the  
194 presence or absence of these features are independent of the role of 3D compartmentalising the  
195 genome for replication fork directionality, as we find no difference in their enrichment for each  
196 RFD initiation group in early and mid S-phase.

197

### 198 ***Replication initiation zones are both common and cell type specific***

199 Given that TADs are largely invariant across different cell types (McArthur and Capra, 2021;  
200 Smith et al., 2016a), we next sought to determine the commonality of chromatin architecture  
201 and replication dynamics across HeLa, IMR90 and K562 and identify if this has an impact on  
202 replication initiation. We first intersected TAD boundaries and found 87% of the HeLa  
203 boundaries overlapped with 50% of the IMR90 boundaries and 65% of the K562 boundaries  
204 (Figure 3A). We performed the same analysis on initiation zones and found that the percentage



205 of overlap of initiation zones was much lower; 32% of HeLa initiation zones overlapped with  
206 25% of IMR90 and 44% of K562 (Supplementary Figure 5A). This overlap was even lower  
207 for initiation zones occurring within TAD boundaries (Hela 25%, IMR90 18% and K562 33%;  
208 Figure 3B). Therefore, while all cell lines display similar enrichment of replication initiation  
209 from TAD boundaries, the genomic position of the initiation zone within the boundary is  
210 variable between cell types.

211  
212 We next focused on how the common and cell type specific initiation zones at TAD boundaries  
213 were activated across S-phase for each cell type. We found that of the initiation zones common  
214 to all cell lines ~ 60% were activated in early S-phase and less than 6% were activated in late  
215 S-phase (Figure 3C-E). The remainder of the initiation zones that were either cell type specific,  
216 or present in two of the three cell lines, had a higher percentage of activation in late S-phase  
217 (7-26%) as compared to the common initiation zones (Figure 3C-E). This suggests that the  
218 common initiation zones in TAD boundaries are important for early replication events, whereas  
219 cell-type specific initiation zones become more prominent in the later stages of replication.

220  
221 We also analysed S-phase length and the spatiotemporal pattern of replication by tracking  
222 PCNA foci in HeLa and IMR90 cultures using live cell imaging. Despite differences in  
223 replication initiation observed in the sequencing data, the spatiotemporal pattern of replication  
224 was similar between both cell types (Figure 3G). There was, however, a significant difference  
225 in S-phase length, which was shorter in IMR90 as compared to HeLa (Figure 3H). Of note  
226 IMR90s had an increased number of TAD boundaries and initiation zones compared to HeLa  
227 cells consistent with a greater number of fired origins per S-phase.

228

## 229 **Discussion**

230 DNA replication is regulated on multiple levels to ensure accurate copying of the DNA once  
231 per cell cycle. Here we expand on the role of 3D chromatin organisation in genome copying  
232 and show that chromatin structure impacts multiple facets of DNA replication. Our study  
233 demonstrates a link between active origin firing, replication dynamics, and 3D chromatin  
234 structure. We find DNA replication primarily initiates from TAD boundaries during early and  
235 mid S, but as the cell cycle proceeds into late S, replication initiation events within TAD  
236 domains become more prevalent. These outcomes were common in two cancer, and one  
237 primary cell type, indicative of conserved mechanisms in healthy and transformed cells.  
238 Notwithstanding conserved general regulatory mechanisms, we did observe cell-type specific

239 outcomes. While the three cell lines analysed shared the majority of TAD domain structure,  
240 they possessed a minority of common initiation zones. Cell lines therefore display both  
241 common and specific regions of replication initiation (Smith and Aladjem, 2014; Smith et al.,  
242 2016b). Where initiation zones were common across all three cell types, these were most often  
243 active in early S, with only 6% of late S-phase initiation zones employed in HeLa, K652 and  
244 IMR90.

245  
246 We also found a correlation between RFD and replication timing. Strong RFD correlated with  
247 persistent decreasing replication fork timing as forks moved away from the initiation zone.  
248 This is consistent with long range replication events as cells progress through S-phase. Weak  
249 RFD correlated with minor changes in replication timing. These data are consistent with short  
250 range replication events, on-coming forks in the other direction completing replication in the  
251 adjacent region, and more common replication termination. Strong or weak RFD could be bi-  
252 or uni-directional from an individual initiation zone, indicating the quality determining RFD  
253 strength was not the initiation zone per se, but some other chromatin quality in the surrounding  
254 region.

255  
256 We observed ORC, CTCF and cohesin binding, along with DNase accessible regions, were  
257 significantly enriched in early and mid-replicating boundaries in both HeLa and K562. In late  
258 S-phase, however, these features were significantly depleted from HeLa initiation zones, and  
259 neither enriched nor depleted in K562. Notably, the presence or absence of CTCF, cohesin, or  
260 DNase accessible regions had no impact on the strength of RFD. While these data suggest none  
261 of these factors influence RFD strength, we cannot rule out a nuanced role for these features in  
262 controlling replication dynamics. Possibilities include CTCF directionality or nucleosome  
263 phasing exerting influence over origin firing and RFD strength. For example, high-density  
264 arrays of CTCF motifs were recently identified at high-efficiency early S-phase initiation zones  
265 (Emerson et al., 2022). CTCF deletion, however, did not significantly alter replication timing  
266 (Sima et al., 2019), suggesting CTCF is likely not the driving factor of origin firing efficiency.  
267 Further research into the role of CTCF and other architectural proteins is needed to fully  
268 understand their potential roles regulating DNA replication through chromatin organisation.

269  
270 There is an increasing body of data showing a role for epigenetics in both DNA replication and  
271 3D chromatin structure. TAD boundaries and ORC binding are enriched for active histone  
272 marks such as H3K4me3 and H3K27ac (Pelham-Webb et al., 2021; Sima et al., 2019; Taberlay



273 et al., 2016). Additionally, early replicating control elements are enriched for enhancer like  
274 epigenetic marks (Sima et al., 2019). More recently, loss of DNA methylation was associated  
275 with altered precision of replication timing and 3D chromatin structure (Du et al., 2021). These  
276 links highlight the combined influence of the epigenome and 3D chromatin structure on  
277 replication timing. However, whether the epigenome has a role specifically in priming  
278 chromatin for replication and origin licencing, or if it additionally functions in selecting origins  
279 for activation is not known. It is interesting to speculate that epigenetic control of these  
280 processes is what allows flexibility in the replication program of different cell types or the  
281 specific bi- and uni-directional RFD strength from initiation zones reported above.

282  
283 A major and intriguing finding of this study was our identification of arrayed initiation zones  
284 within TAD boundaries with common strong uni-directional rightward or leftward RFD. These  
285 regions were linked to a replication timing transition from early to mid, or mid to late, and  
286 consistent with a strong overall uni-directional replication. While the biochemical mechanism  
287 of semi-conservative DNA replication is bi-directional, this does not demand replication  
288 proceed equidistant in both directions within the chromatin context. We predict as origins and  
289 TADs are established in mitosis and G1, TAD boundaries are selected as the prominent  
290 location for replication initiation early in the oncoming S-phase. These early replication regions  
291 may be common or specific between cell lines, depending on the similarity or dissimilarity of  
292 chromatin architecture. Local chromatin features dictate RFD strength from the early and mid-  
293 S TAD boundary initiation zones, with some regions having more prominent left or rightward  
294 moving forks. In some regions, RFD is arrayed to ensure progressive completion of early and  
295 mid-replicating regions before late origin firing occurs. Because replication initiates primarily  
296 from TAD boundaries in early and mid-S, the final regions of the genome copied are internal  
297 within TADs. Which late-S initiation zones within TADs are utilised is likely influenced in a  
298 stochastic nature depending on how replication has progressed thus far in S-phase. We expect  
299 this stochastic nature is why late-S initiation zones are not commonly shared and display a  
300 lower overall lower RFD.

301  
302 In summary, our study links replication dynamics with 3D chromatin organisation. Our  
303 findings support TAD boundaries as having a significant role for replication initiation in early  
304 and mid S-phase and establish a role for 3D chromatin organisation in replication fork  
305 directionality. The consistency of our findings across both cancer and primary cells, highlight  
306 the conservation of this essential function. Future efforts are required to understand how the

307 cell regulates specific RFD strength at individual initiations zones. Further, how 3D chromatin  
308 organization impacts replication dynamics during oncogenic or chemotherapeutic induced  
309 replication stress is of interest.

310 **Acknowledgements**

311 We thank Will Hughes and the Advanced Microscopy Centre at the Children’s Medical  
312 Research Institute for providing the infrastructure and technical support for microscopy  
313 experiments. P.C.T. is supported by Australian National Health & Medical Research Council  
314 (NHMRC) Investigator (GNT1176417), and Project (GNT1161985) grants. A.J.C is supported  
315 by an Australian Research Council (ARC) Future Fellowship (FT210100858), and work in his  
316 lab is supported by grants from the ARC (DP210103885) and NHMRC (1185870).

317

318 **Author Contributions**

319 Conceptualization – K.A.G., P.C.T and A.J.C.

320 Formal Analysis – K.A.G.

321 Investigation – K.A.G. and N.L.

322 Writing – Original Draft – K.A.G

323 Writing – Review & Editing – K.A.G., N.L., P.C.T., A.J.C.

324 Visualization – K.A.G., N.L.

325 Supervision – P.C.T. and A.J.C.

326 Funding Acquisition - P.C.T. and A.J.C.

327

328 **Declaration of Interests**

329 The authors declare no competing interests.

330

331 **Inclusion and diversity**

332 We worked to ensure diversity in experimental samples through the selection of cell lines and  
333 genomic data sets. One or more of the authors of this paper received support from a program  
334 designed to increase minority representation in science.

335 **Figures and legends**

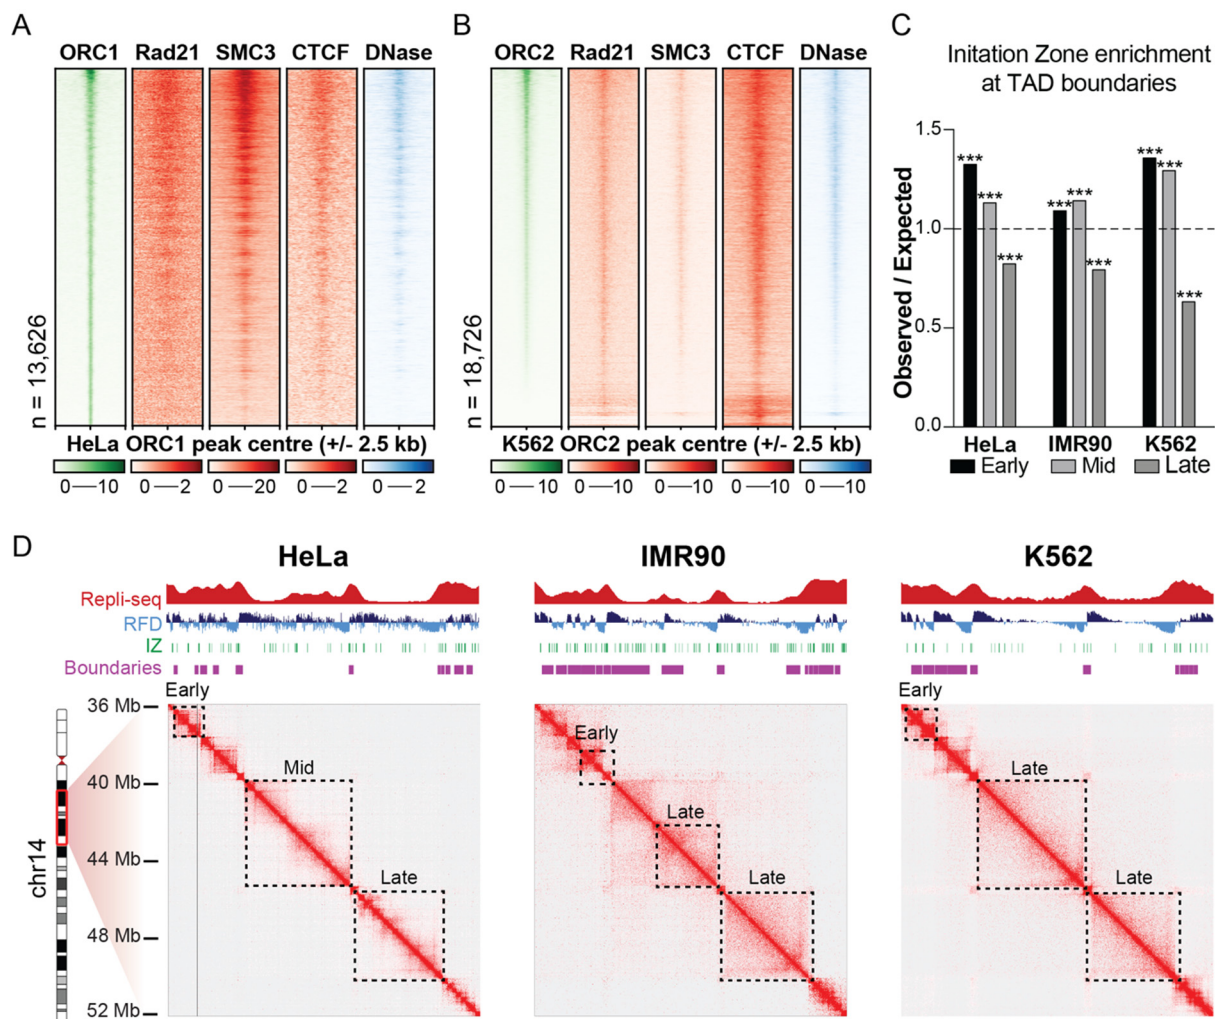

336  
 337 **Figure 1. Early and mid-S replication initiation zones are associated with TAD**  
 338 **boundaries.** (A) Heatmap of ORC1 binding sites in HeLa cells, with corresponding ChIP-seq  
 339 signal for Rad21, SMC3 and CTCF, and DNase accessible regions. Regions are ordered  
 340 according to ORC1 signal strength and plotted +/- 2.5 kb from the centre of the ORC1 binding  
 341 site. (B) As in (A) for ORC2 binding sites in K562 cells. (C) Observed / expected value for  
 342 initiation zones in early, mid and late replicating regions at TAD boundaries. Initiation zones  
 343 are significantly enriched with a score above one or significantly depleted with a score below  
 344 one. A Benjamini–Hochberg adj p-value of  $p < 0.0001$  is denoted as \*\*\*. (D) Example region  
 345 of replication timing (RepliSeq; score scale 0-100), replication fork directionality (RFD; score  
 346 scale -1 to 1), initiation zones, TAD boundaries and Hi-C contact maps on chromosome 14  
 347 from 36-52 Mb. Dotted boxes outline early, mid and late replicating TADs.

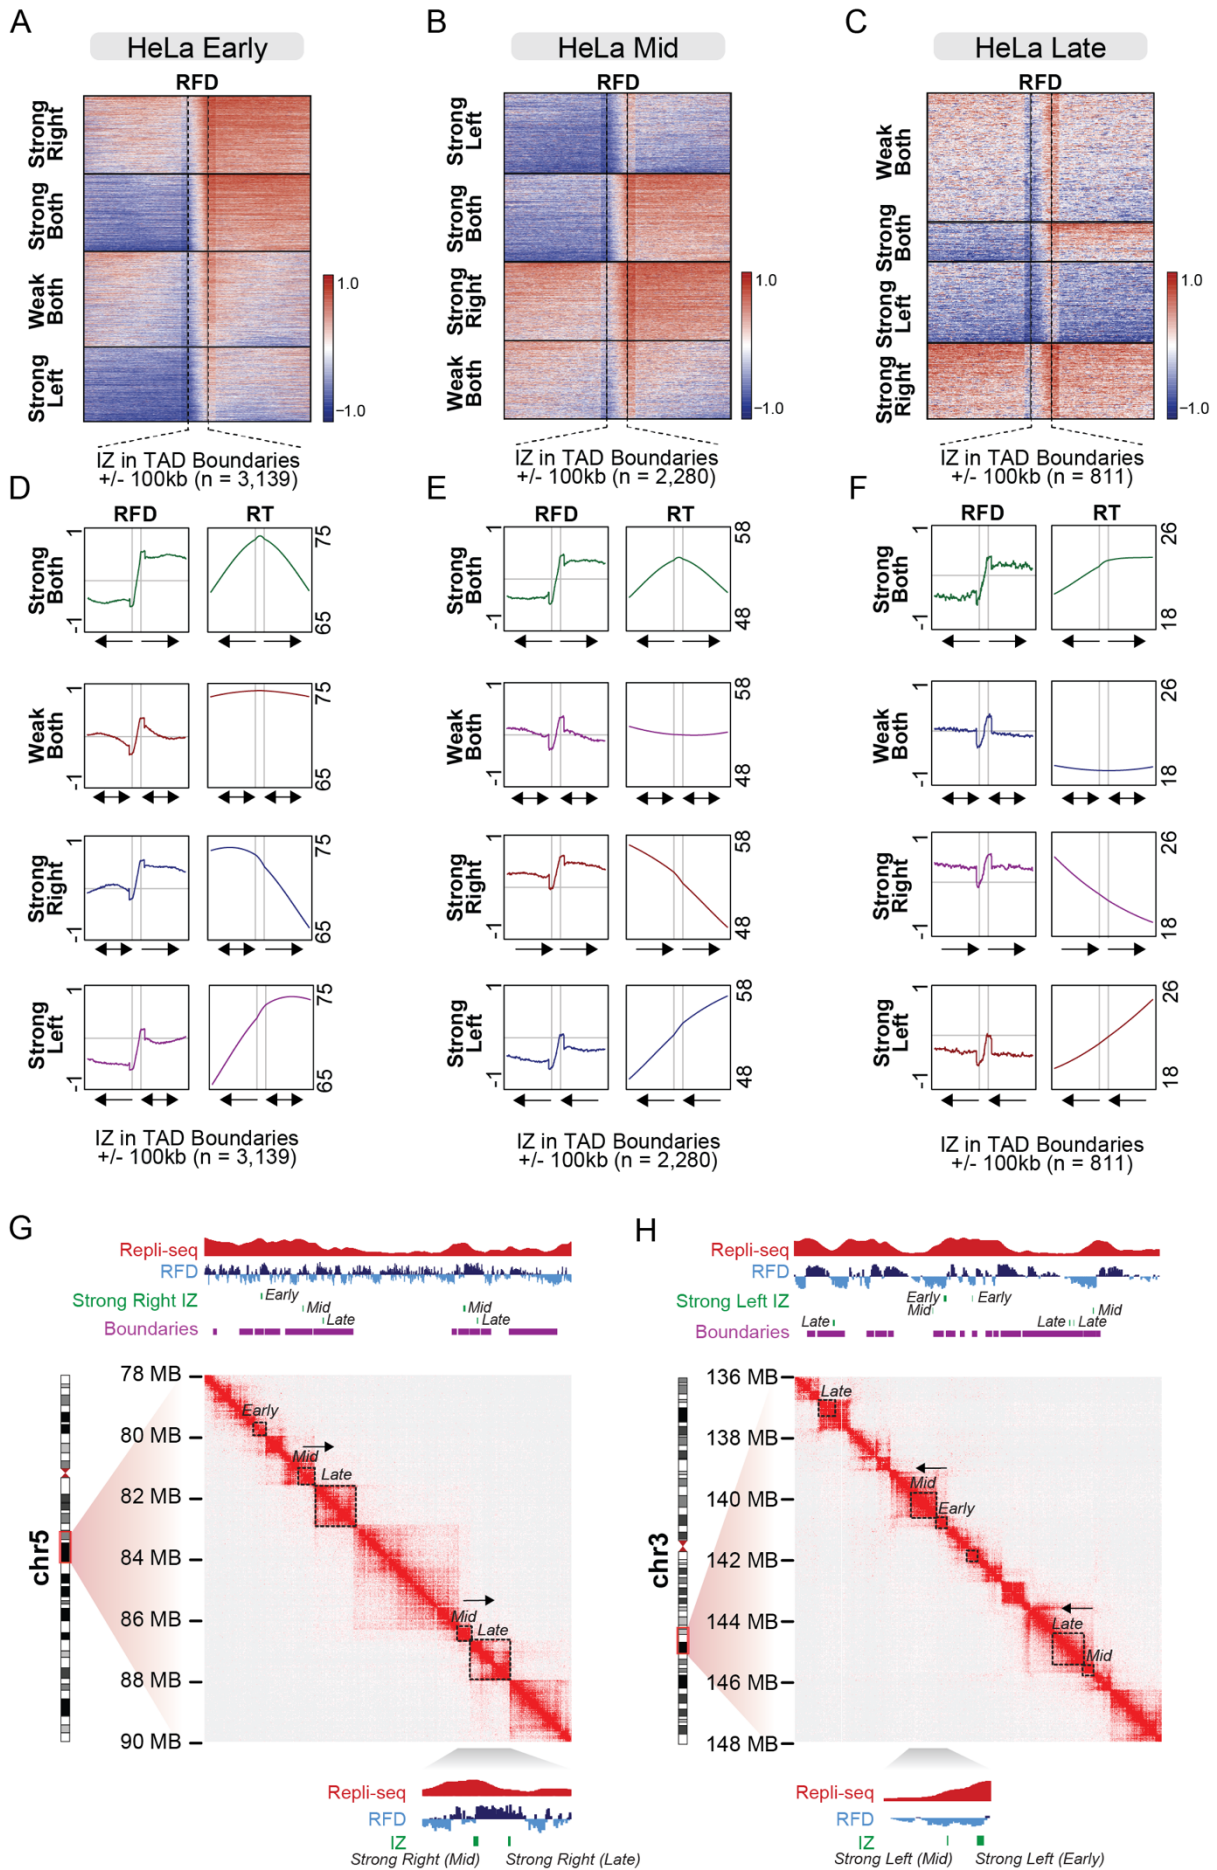



349 **Figure 2. Replication fork directionality initiating from TAD boundaries.** (A-C) Heatmaps  
350 of RFD in early (A) mid (B) or late (C) replicating regions which overlap with TAD boundaries.  
351 Initiation zones are scaled to line up the borders of each region. RFD is plotted +/- 100 kb  
352 either side of the initiation zone, clustered in four groups by kmeans clustering, with each  
353 cluster sorted in descending signal order. (D-F) Profile plots of RFD and replication timing  
354 (RT) within each of the four clusters in (A-C). Arrows indicate average RFD either side of the  
355 initiation zone. Vertical grey lines indicate initiation zone borders and horizontal grey line  
356 indicates a score of zero for RFD. (G, H) Example region of replication timing (Repli-seq;  
357 score scale 0-100), replication fork directionality (RFD; score scale -1 to 1), initiation zones of  
358 strong right moving forks (G) or strong left moving forks (H), TAD boundaries and Hi-C  
359 contact maps on chromosome 5 from 78-90 Mb (G) and chromosome 3 136-148 Mb (H).  
360 Dotted boxes outline early, mid and late replicating TADs where there is strong RFD from a  
361 mid to late replicating TAD (G) and early to mid-replicating TAD (H). An example of each is  
362 expanded below each contact map. Also see Supplementary Figures 2 and 3.



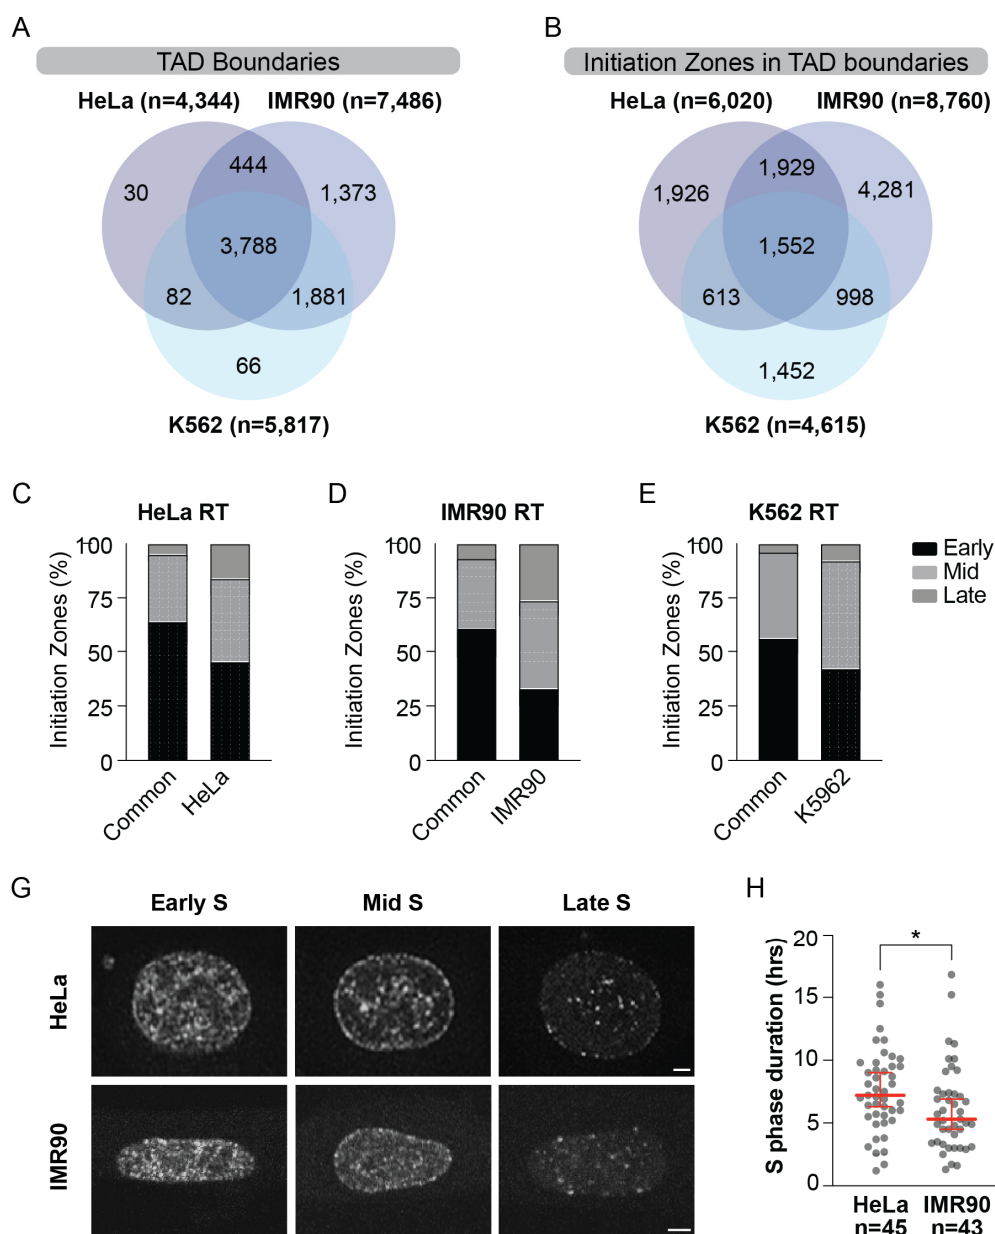

363

364

365

366

367

368

369

370

371

372

373

374

**Figure 3. Cells maintain similar spatiotemporal replication programs despite cell type specific differences to initiation zones.** (A) Venn diagram of TAD boundary intersections between HeLa, IMR90 and K562 cells. (B) Venn diagram overlap of initiation zones within TAD boundaries for HeLa, IMR90 and K562. (C, D, E) Initiation zones within TAD boundaries for those common to HeLa, IMR90 and K562 and initiation zones that are in each cell line, but not common to all cell lines. Bars show the percentage of initiation zones in early, mid and late S-phase for the replication timing (RT) profile for the respective cell line. (G) Representative images of PCNA foci from early, mid and late S-phase cells in HeLa and IMR90s. Scale bar = 5 $\mu$ M. (H) S-phase duration (hours) for HeLa (n=45) and IMR90 (n=43) cells. Red line represents mean and error bars are SD. Significance is  $*p=0.0169$ , two-tailed Mann Whitney non-parametric T-test.

375 **STAR Methods**

| REAGENT or RESOURCE                                      | SOURCE                      | IDENTIFIER      |
|----------------------------------------------------------|-----------------------------|-----------------|
| <b><i>Laboratory consumables</i></b>                     |                             |                 |
| Prolong gold antifade mounting media                     | ThermoFisher Scientific     | P36930          |
| Immersion oil                                            | Zeiss                       | 444970-9010-000 |
| DMEM culture medium                                      | Gibco                       | 11965-092       |
| FluoroBrite DMEM                                         | Gibco                       | A18967-01       |
| GlutaMax                                                 | Gibco                       | 35050-061       |
| Non-essential amino acids                                | Gibco                       | 11140-050       |
| Bovine growth serum                                      | Hyclone                     | SH30541.03      |
| Fetal bovine serum                                       | Sigma                       | F9243           |
| MycoAlet                                                 | Lonza                       | LT07-118        |
| Tissue Culture Dish with Cover Glass bottom              | World Precision Instruments | 22092019        |
| Cell Cycle RFP-PCNA chroobody                            | Chromotek                   | CCR             |
| Lipofectamine LTX                                        | Thermo Fisher Scientific    | 15338-100       |
| <b><i>Laboratory Equipment</i></b>                       |                             |                 |
| Zeiss Cell Observer SD spinning-disk confocal microscope | Zeiss                       |                 |

376

| <b><i>Software</i></b>       |                                                                                                 |
|------------------------------|-------------------------------------------------------------------------------------------------|
| Software / algorithm name    | Source                                                                                          |
| ZEISS Zen Black and Zen Blue | Zeiss (v2.0.14283.302)                                                                          |
| Graphpad Prism v9            | GraphPad Software (v9.4.0)                                                                      |
| Adobe Illustrator 2022       | Adobe (v26.3.1)                                                                                 |
| Adobe Photoshop 2022         | Adobe (v23.3.2)                                                                                 |
| R                            | The R Foundation (v3.6.2)                                                                       |
| Seqplots                     | <a href="http://przemol.github.io/seqplots/#">http://przemol.github.io/seqplots/#</a> (v1.10.6) |
| JuiceBox                     | <a href="https://aidenlab.org/juicebox/">https://aidenlab.org/juicebox/</a> (v2.1.10)           |
| IGV                          | Broad Institute (v2.8.0)                                                                        |

377

378 **Resource availability**

379 Further information and requests for resources should be directed to the Lead Contact  
 380 (tcesare@cmri.org.au).

381

382 ***Materials availability***

383 This study did not generate new unique reagents.

384

385 **Method details**

386 *Data and Code Availability*

387 All next generation sequencing datasets used in this study have been previously published  
388 (Dellino et al., 2013; Miotto et al., 2016; Petryk et al., 2016; Pope et al., 2014; Rao et al., 2014).  
389 Raw and processed files for ChIP-seq, DNase-seq, Hi-C and Repli-seq are available on Gene  
390 Expression Omnibus ([ncbi.nlm.nih.gov/geo/](http://ncbi.nlm.nih.gov/geo/)), with accession numbers listed in Supplementary  
391 Table 1. Processed OK-seq data (RFD, initiation zones and termination zones) is available on  
392 Github ([github.com/CL-CHEN-Lab/OK-Seq](https://github.com/CL-CHEN-Lab/OK-Seq)). All code used for analysis and data visualisation  
393 is available from public sources and packages available on Bioconductor and Github.

394

395 *Data Intersections and enrichment*

396 Data intersections were performed with R with *GenomicRanges* package v1.38.0. Significant  
397 enrichment or depletion was determined with the genome association tester v1.0 (Heger et al.,  
398 2013). The observed over expected value was calculated with 10,000 iterations and determine  
399 statistically significant if the q-value was less than 0.0001.

400

401 *Data visualisation*

402 ChIP-seq and DNase-seq heatmaps were generated with deepTools2 v3.5.1. RFD heatmaps  
403 and profile plots were generated with Seqplots v1.10.6. Hi-C contact maps were created in  
404 JuiceBox v2.1.10. Genome track images of OK-seq, Repli-seq, domain boundaries and  
405 initiation zones were generated with IGV v2.8.0.

406

407 *Cell Culture Maintenance*

408 HeLa cells and IMR90 fibroblasts were kindly provide by J. Karlseder (Salk Institute). All cells  
409 were grown in DMEM (Gibco, 11965-092) supplemented with and 1% GlutaMax (Gibco,  
410 35050-061) and 1% non-essential amino acids (Gibco, 11140-050). HeLa cell culture media  
411 was supplemented with 10% bovine growth serum (Hyclone, SH30541.03) and IMR90 culture  
412 media with 10% fetal bovine serum (Sigma, F9243). Cell cultures were maintained in 37 °C  
413 with 10% CO<sub>2</sub> and 3% O<sub>2</sub>. Cells were passaged at approximately 80% confluence. Both cell  
414 lines were verified by Cell Bank Australia using STR profiling and confirmed to be  
415 mycoplasma negative (MycoAlet, LT07-118, Lonza).

416

417 *Live Cell Imaging*

418 Cells were prepared for live cell imaging by seeding  $2 \times 10^5$  cells on a 3 cm glass bottom  
419 culture dish (World Precision Instruments). After 24 hrs cells were transfected with RFP-  
420 PCNA chromobody (Chromotek, PCNA-CB, purchased with a material transfer agreement)  
421 using Lipofectamine LTX (Thermo Fisher Scientific, 15338-100) as per the manufacturer's  
422 instructions. After 24 hrs media was replaced with FluoroBrite DMEM (Gibco, A18967-01),  
423 supplemented as described above. Imaging was performed in culture conditions described  
424 above on a Zeiss Cell Observer SD spinning-disk confocal microscope using combined  
425 differential interface contrast and fluorescence imaging (a 561 laser, 7% excitation power, 1 x  
426 1 binning, and EM gain of 920) with appropriate filter sets and a x63 / 1.3 NA oil-immersion  
427 objective. Ten images per z stack ( $9 \mu\text{m}$ ) were captured in an image scaled to 47,504 px x  
428 37,602px at 10.05  $\mu\text{M}$  using Zen Blue 2 (Zeiss, v2.0.14283.302) and Evolve Delta  
429 (Photometrics) camera every 90-200 seconds for up to 48 hrs. S-phase duration was calculated  
430 as time in hours from the appearance of the first PCNA foci until the disappearance of the last  
431 foci.

## 432 **References**

- 433 Achinger-Kawecka, J., Valdes-Mora, F., Luu, P.L., Giles, K.A., Caldon, C.E., Qu, W., Nair,  
434 S., Soto, S., Locke, W.J., Yeo-Teh, N.S., *et al.* (2020). Epigenetic reprogramming at estrogen-  
435 receptor binding sites alters 3D chromatin landscape in endocrine-resistant breast cancer. *Nat*  
436 *Commun* *11*, 320.
- 437 Audit, B., Zaghoul, L., Vaillant, C., Chevereau, G., d'Aubenton-Carafa, Y., Thermes, C., and  
438 Arneodo, A. (2009). Open chromatin encoded in DNA sequence is the signature of 'master'  
439 replication origins in human cells. *Nucleic Acids Res* *37*, 6064-6075.
- 440 Burgers, P.M.J., and Kunkel, T.A. (2017). Eukaryotic DNA Replication Fork. *Annu Rev*  
441 *Biochem* *86*, 417-438.
- 442 Cvetic, C., and Walter, J.C. (2005). Eukaryotic origins of DNA replication: could you please  
443 be more specific? *Semin Cell Dev Biol* *16*, 343-353.
- 444 Dellino, G.I., Cittaro, D., Piccioni, R., Luzi, L., Banfi, S., Segalla, S., Cesaroni, M., Mendoza-  
445 Maldonado, R., Giacca, M., and Pelicci, P.G. (2013). Genome-wide mapping of human DNA-  
446 replication origins: levels of transcription at ORC1 sites regulate origin selection and  
447 replication timing. *Genome Res* *23*, 1-11.
- 448 Dimitrova, D.S., and Gilbert, D.M. (1999). The spatial position and replication timing of  
449 chromosomal domains are both established in early G1 phase. *Mol Cell* *4*, 983-993.
- 450 Ding, Q., and Koren, A. (2020). Positive and Negative Regulation of DNA Replication  
451 Initiation. *Trends Genet* *36*, 868-879.
- 452 Du, Q., Smith, G.C., Luu, P.L., Ferguson, J.M., Armstrong, N.J., Caldon, C.E., Campbell,  
453 E.M., Nair, S.S., Zotenko, E., Gould, C.M., *et al.* (2021). DNA methylation is required to  
454 maintain both DNA replication timing precision and 3D genome organization integrity. *Cell*  
455 *Rep* *36*, 109722.
- 456 Emerson, D.J., Zhao, P.A., Cook, A.L., Barnett, R.J., Klein, K.N., Saulebekova, D., Ge, C.,  
457 Zhou, L., Simandi, Z., Minsk, M.K., *et al.* (2022). Cohesin-mediated loop anchors confine the  
458 locations of human replication origins. *Nature*.
- 459 Giles, K.A., Gould, C.M., Du, Q., Skvortsova, K., Song, J.Z., Maddugoda, M.P., Achinger-  
460 Kawecka, J., Stirzaker, C., Clark, S.J., and Taberlay, P.C. (2019). Integrated epigenomic  
461 analysis stratifies chromatin remodellers into distinct functional groups. *Epigenetics*  
462 *Chromatin* *12*, 12.
- 463 Guillou, E., Ibarra, A., Coulon, V., Casado-Vela, J., Rico, D., Casal, I., Schwob, E., Losada,  
464 A., and Mendez, J. (2010). Cohesin organizes chromatin loops at DNA replication factories.  
465 *Genes Dev* *24*, 2812-2822.
- 466 Heger, A., Webber, C., Goodson, M., Ponting, C.P., and Lunter, G. (2013). GAT: a simulation  
467 framework for testing the association of genomic intervals. *Bioinformatics* *29*, 2046-2048.
- 468 Jacob, F., and Brenner, S. (1963). [On the regulation of DNA synthesis in bacteria: the  
469 hypothesis of the replicon]. *C R Hebd Seances Acad Sci* *256*, 298-300.

- 470 Khoury, A., Achinger-Kawecka, J., Bert, S.A., Smith, G.C., French, H.J., Luu, P.L., Peters,  
471 T.J., Du, Q., Parry, A.J., Valdes-Mora, F., *et al.* (2020). Constitutively bound CTCF sites  
472 maintain 3D chromatin architecture and long-range epigenetically regulated domains. *Nat*  
473 *Commun* *11*, 54.
- 474 Limas, J.C., and Cook, J.G. (2019). Preparation for DNA replication: the key to a successful S  
475 phase. *FEBS Lett* *593*, 2853-2867.
- 476 Liu, Y., Wu, X., D'aubenton-Carafa, Y., Thermes, C., and Chen, C. (2022). OKseqHMM: a  
477 genome-wide replication fork directionality analysis toolkit. *bioRxiv*.
- 478 Lombardi, E.P., and Tarsounas, M. (2020). Topologically associating domain boundaries are  
479 enriched in early firing origins and restrict replication fork progression. *bioRxiv*.
- 480 Marks, A.B., Fu, H., and Aladjem, M.I. (2017). Regulation of Replication Origins. *Adv Exp*  
481 *Med Biol* *1042*, 43-59.
- 482 McArthur, E., and Capra, J.A. (2021). Topologically associating domain boundaries that are  
483 stable across diverse cell types are evolutionarily constrained and enriched for heritability. *Am*  
484 *J Hum Genet* *108*, 269-283.
- 485 Mechali, M. (2010). Eukaryotic DNA replication origins: many choices for appropriate  
486 answers. *Nature reviews Molecular cell biology* *11*, 728-738.
- 487 Miotto, B., Ji, Z., and Struhl, K. (2016). Selectivity of ORC binding sites and the relation to  
488 replication timing, fragile sites, and deletions in cancers. *Proc Natl Acad Sci U S A* *113*, E4810-  
489 4819.
- 490 Nuebler, J., Fudenberg, G., Imakaev, M., Abdennur, N., and Mirny, L.A. (2018). Chromatin  
491 organization by an interplay of loop extrusion and compartmental segregation. *Proc Natl Acad*  
492 *Sci U S A* *115*, E6697-E6706.
- 493 Pelham-Webb, B., Polyzos, A., Wojenski, L., Kloetgen, A., Li, J., Di Giammartino, D.C.,  
494 Sakellaropoulos, T., Tsirigos, A., Core, L., and Apostolou, E. (2021). H3K27ac bookmarking  
495 promotes rapid post-mitotic activation of the pluripotent stem cell program without impacting  
496 3D chromatin reorganization. *Mol Cell* *81*, 1732-1748 e1738.
- 497 Petryk, N., Kahli, M., d'Aubenton-Carafa, Y., Jaszczyszyn, Y., Shen, Y., Silvain, M., Thermes,  
498 C., Chen, C.L., and Hyrien, O. (2016). Replication landscape of the human genome. *Nat*  
499 *Commun* *7*, 10208.
- 500 Pope, B.D., Ryba, T., Dileep, V., Yue, F., Wu, W., Denas, O., Vera, D.L., Wang, Y., Hansen,  
501 R.S., Canfield, T.K., *et al.* (2014). Topologically associating domains are stable units of  
502 replication-timing regulation. *Nature* *515*, 402-405.
- 503 Rao, S.S., Huntley, M.H., Durand, N.C., Stamenova, E.K., Bochkov, I.D., Robinson, J.T.,  
504 Sanborn, A.L., Machol, I., Omer, A.D., Lander, E.S., *et al.* (2014). A 3D map of the human  
505 genome at kilobase resolution reveals principles of chromatin looping. *Cell* *159*, 1665-1680.
- 506 Sima, J., Chakraborty, A., Dileep, V., Michalski, M., Klein, K.N., Holcomb, N.P., Turner, J.L.,  
507 Paulsen, M.T., Rivera-Mulia, J.C., Trevilla-Garcia, C., *et al.* (2019). Identifying cis Elements  
508 for Spatiotemporal Control of Mammalian DNA Replication. *Cell* *176*, 816-830 e818.



- 509 Smith, E.M., Lajoie, B.R., Jain, G., and Dekker, J. (2016a). Invariant TAD Boundaries  
510 Constrain Cell-Type-Specific Looping Interactions between Promoters and Distal Elements  
511 around the CFTR Locus. *Am J Hum Genet* 98, 185-201.
- 512 Smith, O.K., and Aladjem, M.I. (2014). Chromatin structure and replication origins:  
513 determinants of chromosome replication and nuclear organization. *J Mol Biol* 426, 3330-3341.
- 514 Smith, O.K., Kim, R., Fu, H., Martin, M.M., Lin, C.M., Utani, K., Zhang, Y., Marks, A.B.,  
515 Lalonde, M., Chamberlain, S., *et al.* (2016b). Distinct epigenetic features of differentiation-  
516 regulated replication origins. *Epigenetics Chromatin* 9, 18.
- 517 Su, Q.P., Zhao, Z.W., Meng, L., Ding, M., Zhang, W., Li, Y., Liu, M., Li, R., Gao, Y.Q., Xie,  
518 X.S., *et al.* (2020). Superresolution imaging reveals spatiotemporal propagation of human  
519 replication foci mediated by CTCF-organized chromatin structures. *Proc Natl Acad Sci U S A*  
520 117, 15036-15046.
- 521 Taberlay, P.C., Achinger-Kawecka, J., Lun, A.T., Buske, F.A., Sabir, K., Gould, C.M.,  
522 Zotenko, E., Bert, S.A., Giles, K.A., Bauer, D.C., *et al.* (2016). Three-dimensional  
523 disorganization of the cancer genome occurs coincident with long-range genetic and epigenetic  
524 alterations. *Genome Res* 26, 719-731.
- 525 Wang, L., Gao, Y., Zheng, X., Liu, C., Dong, S., Li, R., Zhang, G., Wei, Y., Qu, H., Li, Y., *et*  
526 *al.* (2019). Histone Modifications Regulate Chromatin Compartmentalization by Contributing  
527 to a Phase Separation Mechanism. *Mol Cell* 76, 646-659 e646.
- 528 Wutz, G., Varnai, C., Nagasaka, K., Cisneros, D.A., Stocsits, R.R., Tang, W., Schoenfelder,  
529 S., Jessberger, G., Muhar, M., Hossain, M.J., *et al.* (2017). Topologically associating domains  
530 and chromatin loops depend on cohesin and are regulated by CTCF, WAPL, and PDS5  
531 proteins. *EMBO J* 36, 3573-3599.
- 532 Zhang, Y., and Kutateladze, T.G. (2019). Liquid-liquid phase separation is an intrinsic  
533 physicochemical property of chromatin. *Nat Struct Mol Biol* 26, 1085-1086.  
534

535 **Supplemental Figures and Tables**

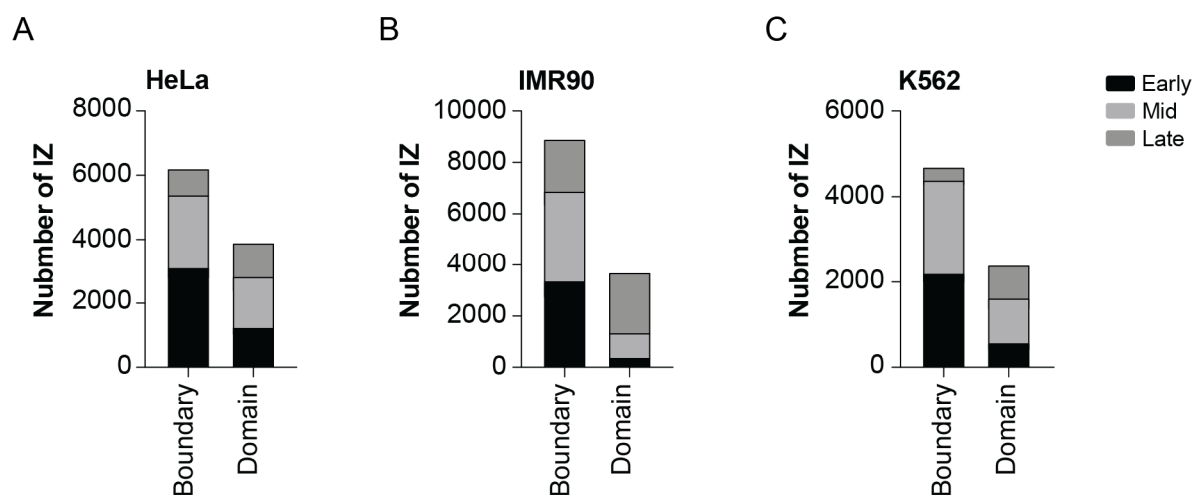

536

537 **Supplementary Figure 1. (A)** Number of HeLa initiation zones overlapping with domain  
538 boundaries and TAD domains from HeLa Hi-C data. Initiation zones are subdivided into those  
539 overlapping early, mid or late replicating regions from HeLa Repliseq data. **(B)** As in (A) for  
540 IMR90. **(C)** as in (A) for K562.

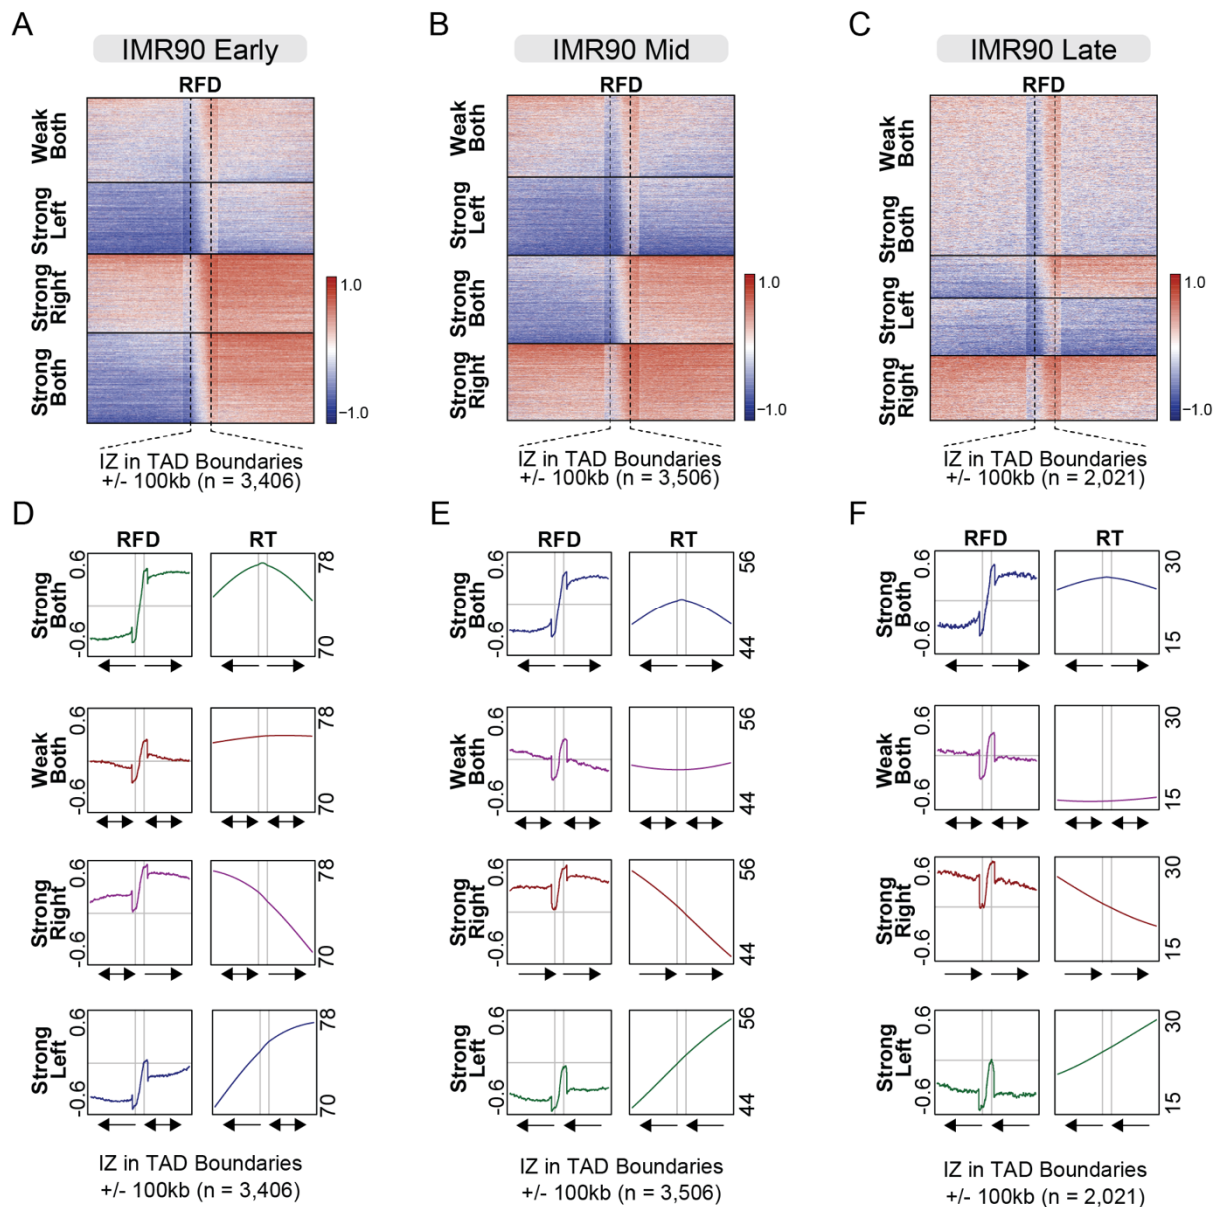

541

542 **Supplementary Figure 2.** (A-C) Heatmaps of IMR90 replication fork directionality (RFD) in

543 early (A) mid (B) or late (C) replicating initiation zones that overlap with TAD boundaries.

544 Initiation zones are scaled to line up the borders so that RFD either side of the initiation zone

545 is plotted +/- 100 kb. Vertical dotted lines indicate initiation zone border. Initiation zones are

546 clustered in four groups by kmeans clustering, with each cluster sorted in descending signal

547 order. (D-F) Profile plots of IMR90 replication fork directionality (RFD) and replicating timing

548 (RT) within each of the four clusters (from A-C). Grey lines indicate initiation zone borders,

549 with arrows indicating main RFD either side of the initiation zone. Horizontal grey line

550 indicates a score of zero for RFD. Arrows under plots indicate average RFD.

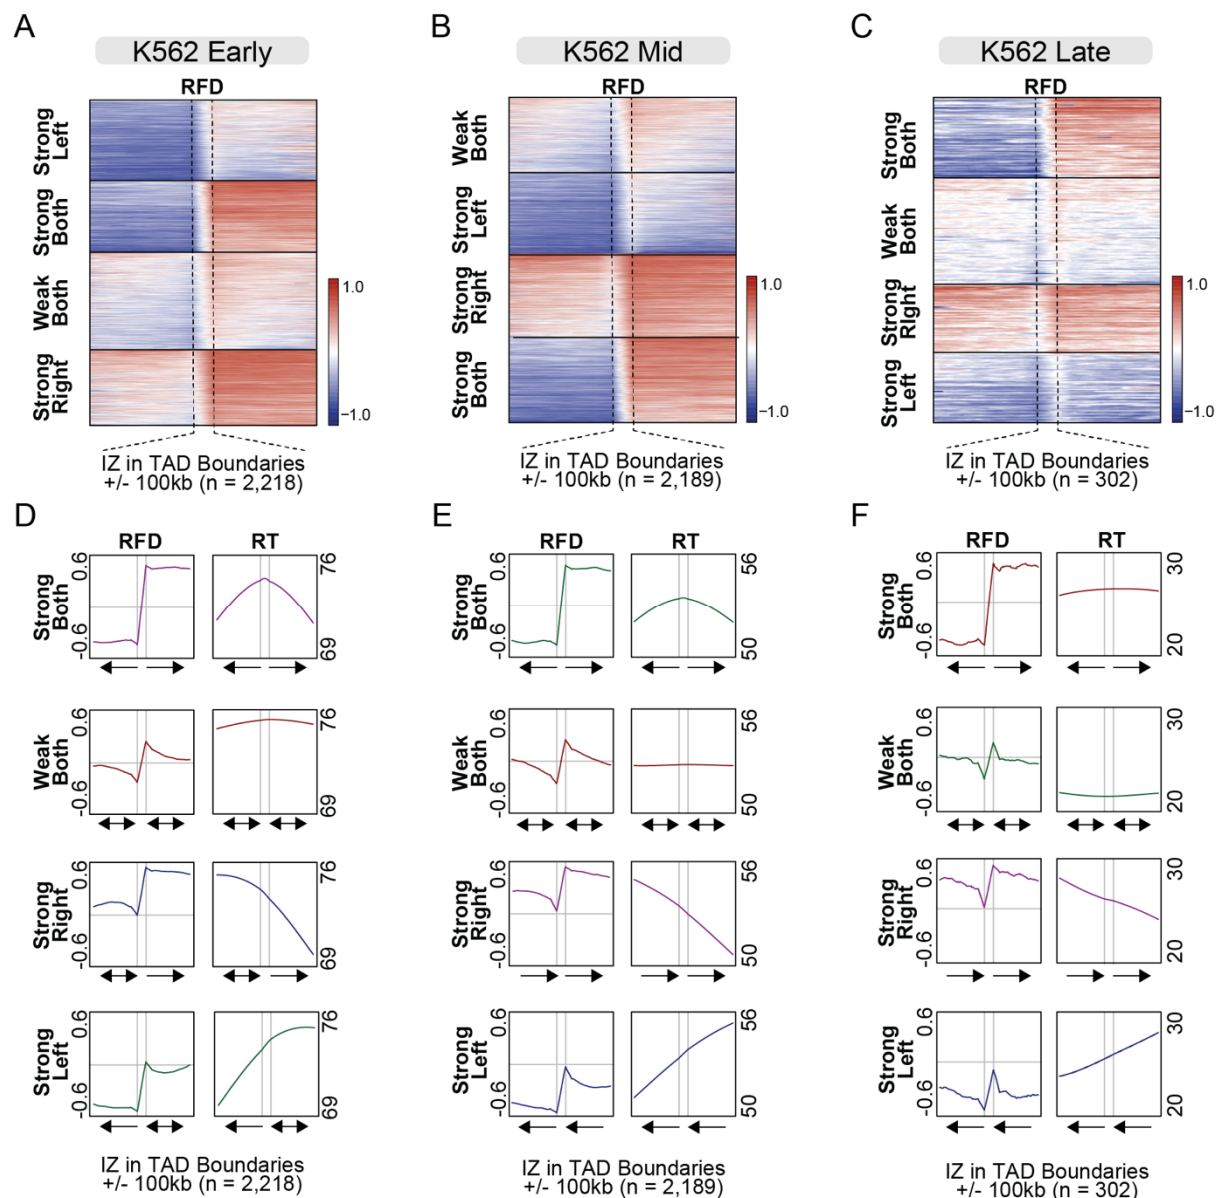

551

552 **Supplementary Figure 3.** (A-C) Heatmaps of K562 replication fork directionality (RFD) in

553 early (A) mid (B) or late (C) replicating initiation zones that overlap with TAD boundaries.

554 Initiation zones are scaled to line up the borders so that RFD either side of the initiation zone

555 is plotted +/- 100 kb. Vertical dotted lines indicate initiation zone border. Initiation zones are

556 clustered in four groups by kmeans clustering, with each cluster sorted in descending signal

557 order. (D-F) Profile plots of K562 replication fork directionality (RFD) and replicating timing

558 (RT) within each of the four clusters (from A-C). Grey lines indicate initiation zone borders,

559 with arrows indicating main RFD either side of the initiation zone. Horizontal grey line

560 indicates a score of zero for RFD. Arrows under plots indicate average RFD.

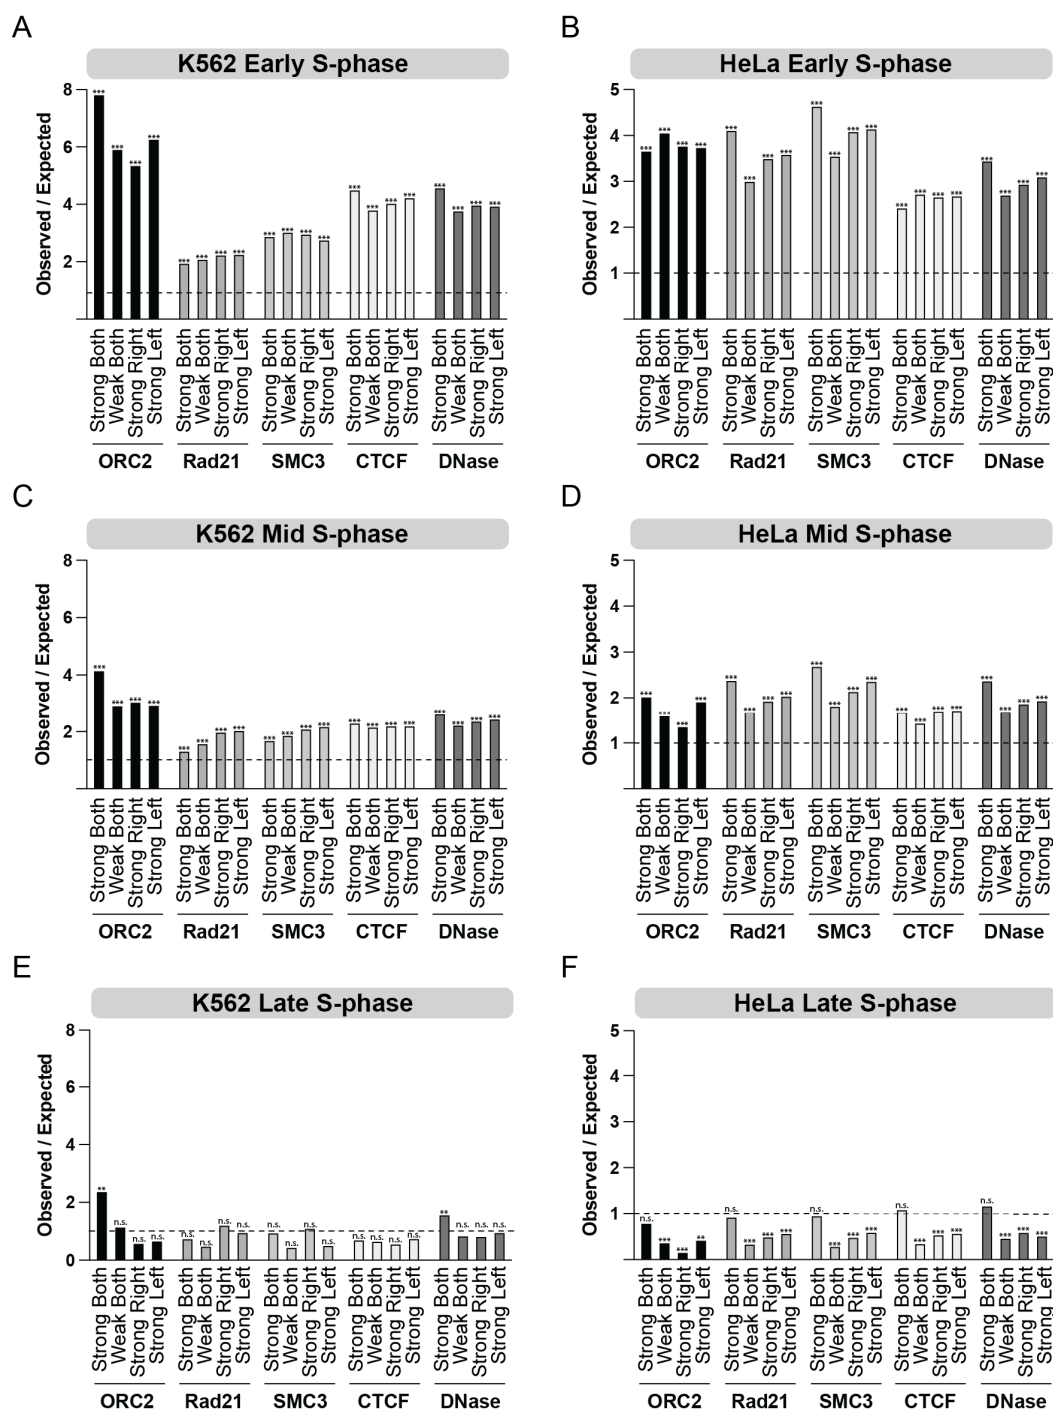

561

562 **Supplementary Figure 4. (A-F)** Observed / expected enrichment of ORC2, Rad21, SMC3,  
 563 CTCF and DNase accessible chromatin regions at initiation zones within TAD boundaries in  
 564 K562 (A, C, E) and HeLa (B, D, F) cells. Initiation zones are subdivided into early (A-B), mid  
 565 (C-D) and late (E-F) S-phase, and further subdivided based on replication fork direction from  
 566 the groups in Supplementary Figure 3 (K562) and Figure 2 (HeLa). Initiation zones are  
 567 significantly enriched with a score above one or significantly depleted with a score below one.  
 568 A Benjamini–Hochberg adj  $p$ -value of  $p < 0.001$  is denoted as \*\*,  $p < 0.0001$  as \*\*\* and not  
 569 significant as ‘n.s.’.

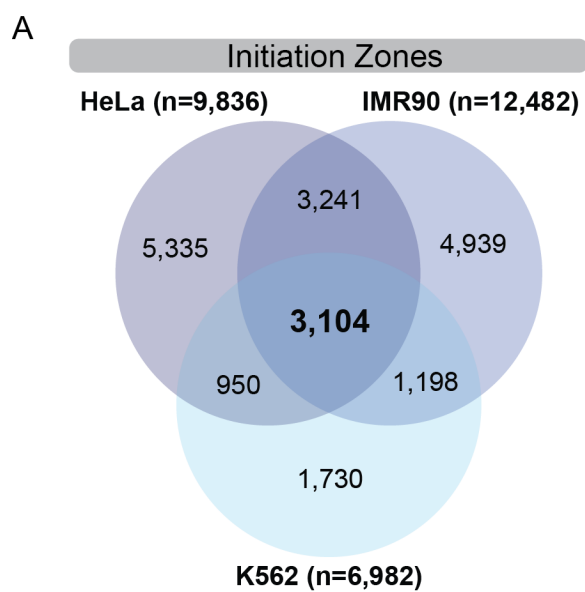

570

571 **Supplementary Figure 5. (A)** Venn diagram of initiation zones intersections between HeLa,

572 IMR90 and K562 cells.



573 **Supplementary Table 1.** Accession numbers for published data used in this manuscript.

| Cell Line | Experiment            | Database | Accession  | Reference           |
|-----------|-----------------------|----------|------------|---------------------|
| HeLa      | ORC1 ChIP-seq         | GEO      | GSM922790  | Dellino et al, 2013 |
| HeLa      | Rad21 ChIP-seq        | GEO      | GSM935571  | Pope et al, 2014    |
| HeLa      | SMC3 ChIP-seq         | GEO      | GSM935384  | Pope et al, 2014    |
| HeLa      | CTCF ChIP-seq         | GEO      | GSM749729  | Pope et al, 2014    |
| HeLa      | DNase-seq             | GEO      | GSM816643  | Pope et al, 2014    |
| HeLa      | OK-seq processed data | GitHub   | N/A        | Petryk et al, 2016  |
| HeLa      | HiC                   | GEO      | GSE63525   | Rao et al, 2014     |
| HeLa      | Repli-seq             | GEO      | GSM923449  | Pope et al, 2014    |
| K562      | ORC2 ChIP-seq         | GEO      | GSM1717888 | Miotto et al, 2016  |
| K562      | Rad21 ChIP-seq        | GEO      | GSM935319  | Pope et al, 2014    |
| K562      | SMC3 ChIP-seq         | GEO      | GSM935310  | Pope et al, 2014    |
| K562      | CTCF ChIP-seq         | GEO      | GSM733719  | Pope et al, 2014    |
| K562      | DNase-seq             | GEO      | GSM816655  | Pope et al, 2014    |
| K562      | OK-seq processed data | GitHub   | N/A        | Petryk et al, 2016  |
| K562      | HiC                   | GEO      | GSE63525   | Rao et al, 2014     |
| K562      | Repli-seq             | GEO      | GSM923448  | Pope et al, 2014    |
| IMR90     | OK-seq processed data | GitHub   | N/A        | Petryk et al, 2016  |
| IMR90     | HiC                   | GEO      | GSE63525   | Rao et al, 2014     |
| IMR90     | Repli-seq             | GEO      | GSM923447  | Pope et al, 2014    |

574
